# Supplementary material for: Emerging investigator series: quantitative insights into the relationship between the concentrations and SERS intensities of neonicotinoids in water
Source: Royal Society of Chemistry journal article supplement (doi:10.1039/d4en00221k), 2024-01-01
Supplement: d4en00221k1.pdf [file d4en00221k1.pdf]

**Supporting Information for**

**Emerging investigator series: quantitative insights into the**

**relationship between the concentrations and SERS intensities of**

**neonicotinoids in water**

Shengdong Liu,<sup>ab</sup> James Lazarcik,<sup>b</sup> Haoran Wei,<sup>\* ab</sup>

<sup>a</sup> Environmental Chemistry and Technology Program, University of Wisconsin–Madison, Madison, WI 53706, United States.

<sup>b</sup> Department of Civil and Environmental Engineering, University of Wisconsin–Madison, Madison, WI 53706, United States.

A Summary of Tables and Figures in Supporting Information:

**Table S1.** HPLC method for CLO and IMD quantification

**Table S2-9.** Fitting parameters of the adsorption isotherms for the CLO and IMD data

**Figure S1.** pH effect on the SERS spectra of IMD and CLO

**Figure S2-3.** SERS spectra of CLO and IMD collected at different concentrations

**Figure S4.** The relationship between initial concentrations/logarithmic initial concentrations of CLO and its normalized SERS intensities

**Figure S5.** The relationship between the normalized SERS intensities of CLO and IMD and their differential concentrations ( $\Delta C$ ) within an extended initial concentration range from 0 to 10  $\mu\text{M}$

**Figure S6.** The relationships between initial concentrations/logarithmic initial concentrations of IMD and their normalized SERS intensities

**Table S1.** High-performance liquid chromatography (HPLC) method for imidacloprid (IMD) and clothianidin (CLO) quantification

| <b>HPLC Instrument Conditions</b> |                                                                         |
|-----------------------------------|-------------------------------------------------------------------------|
| HPLC                              | Agilent 1260 Infinity                                                   |
| Analytical Column                 | Agilent Poroshell 120 EC-C18 3x50mm, 2.7 $\mu$ m                        |
| Guard column                      | Agilent Eclipse Plus C18 4.6x5mm, 1.8 $\mu$ m                           |
| Column Temperature                | 30 $^{\circ}$ C                                                         |
| Injection Volume                  | 25 $\mu$ L                                                              |
| Mobile Phase                      | 85% (0.1% Formic acid in water); 15% (0.1% Formic acid in acetonitrile) |
| Flow rate                         | 1 mL/min                                                                |
| Stop time                         | 2.5                                                                     |
| <b>Detector settings</b>          |                                                                         |
| Wavelength                        | 269 nm                                                                  |
| Bandwidth                         | 4 nm                                                                    |
| Reference wavelength              | 360 nm                                                                  |
| Reference Bandwidth               | 100 nm                                                                  |
| Collection frequency              | 2.5 Hz                                                                  |

The retention times for CLO and IMD are 1.83 and 2.07 min, respectively.

**Table S2.** Freundlich and Langmuir adsorption isotherm fitting parameters for CLO data shown in **Fig. 2a**

| Equation | $y = a \cdot x^b$     | $y = \frac{a \cdot b \cdot x}{1 + b \cdot x}$ |
|----------|-----------------------|-----------------------------------------------|
| a        | $0.61326 \pm 0.02718$ | $1.60831 \pm 0.11761$                         |
| b        | $0.44599 \pm 0.02744$ | $0.75315 \pm 0.19734$                         |

**Table S3.** Langmuir adsorption isotherm fitting parameters for CLO data shown in **Fig. S4a**

| Equation | $y = \frac{a \cdot b \cdot x}{1 + b \cdot x}$ |
|----------|-----------------------------------------------|
| a        | $0.16193 \pm 0.02861$                         |
| b        | $1.18373 \pm 0.50669$                         |

**Table S4.** Freundlich and Langmuir adsorption isotherm fitting parameters for CLO data shown in **Fig. 2b**

| Equation | $y = a \cdot x^b$     | $y = \frac{a \cdot b \cdot x}{1 + b \cdot x}$ |
|----------|-----------------------|-----------------------------------------------|
| a        | $0.09486 \pm 0.00732$ | $0.1491 \pm 0.02718$                          |
| b        | $0.23464 \pm 0.04558$ | $3.36684 \pm 1.82347$                         |

**Table S5.** Linear fitting parameters for CLO data shown in **Fig. 2c**

| Equation  | $y = a + b \cdot x$    |
|-----------|------------------------|
| Intercept | $0.00179 \pm 2.196E-4$ |
| Slope     | $0.17556 \pm 0.00929$  |

**Table S6.** Freundlich and Langmuir adsorption isotherm fitting parameters for IMD data shown in **Fig. 3a**

| Equation | $y = a \cdot x^b$     | $y = \frac{a \cdot b \cdot x}{1 + b \cdot x}$ |
|----------|-----------------------|-----------------------------------------------|
| a        | $0.53749 \pm 0.01573$ | $1.36125 \pm 0.1183$                          |
| b        | $0.4044 \pm 0.0138$   | $0.78953 \pm 0.25545$                         |

**Table S7.** Langmuir adsorption isotherm fitting parameters for IMD data shown in **Fig. S6a**

| Equation | $y = a*b*x/(1+b*x)$   |
|----------|-----------------------|
| a        | $0.06282 \pm 0.0024$  |
| b        | $2.27209 \pm 0.35542$ |

**Table S8.** Freundlich and Langmuir isotherm fitting parameters for IMD data shown in **Fig. 3b**

| Equation | $y = a*x^b$           | $y = a*b*x/(1+b*x)$   |
|----------|-----------------------|-----------------------|
| a        | $0.04213 \pm 0.00269$ | $0.05843 \pm 0.00237$ |
| b        | $0.2089 \pm 0.03405$  | $8.79693 \pm 1.92877$ |

**Table S9.** Linear fitting parameters for IMD data shown in **Fig. 3c**

| Equation  | $y = a + b*x$            |
|-----------|--------------------------|
| Intercept | $0.00579 \pm 0.00144$    |
| Slope     | $0.00874 \pm 4.71822E-4$ |

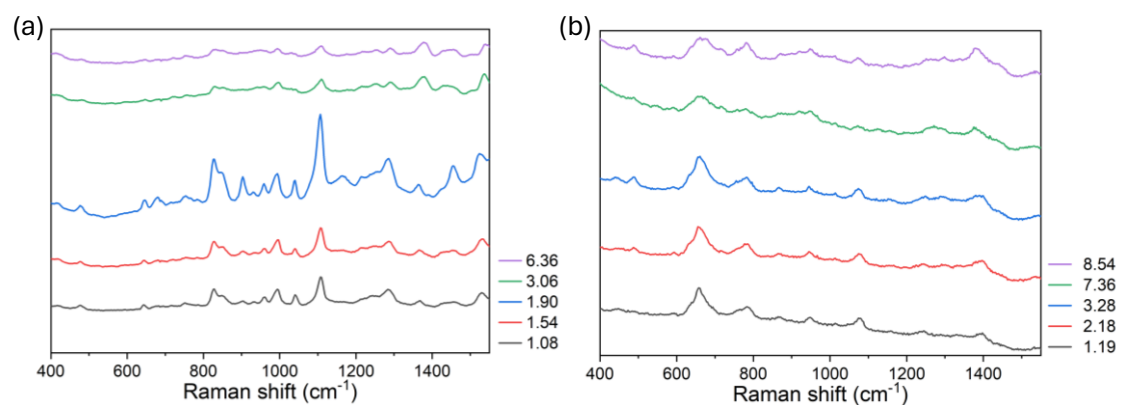

**Figure S1.** a) SERS spectra of 100  $\mu\text{M}$  imidacloprid measured by AuNP/BC substrates at different pH values ranging from 1.08 to 6.36. b) SERS spectra of 10  $\mu\text{M}$  clothianidin measured by AuNP/BC substrates at different pH values ranging from 1.19 to 8.54.

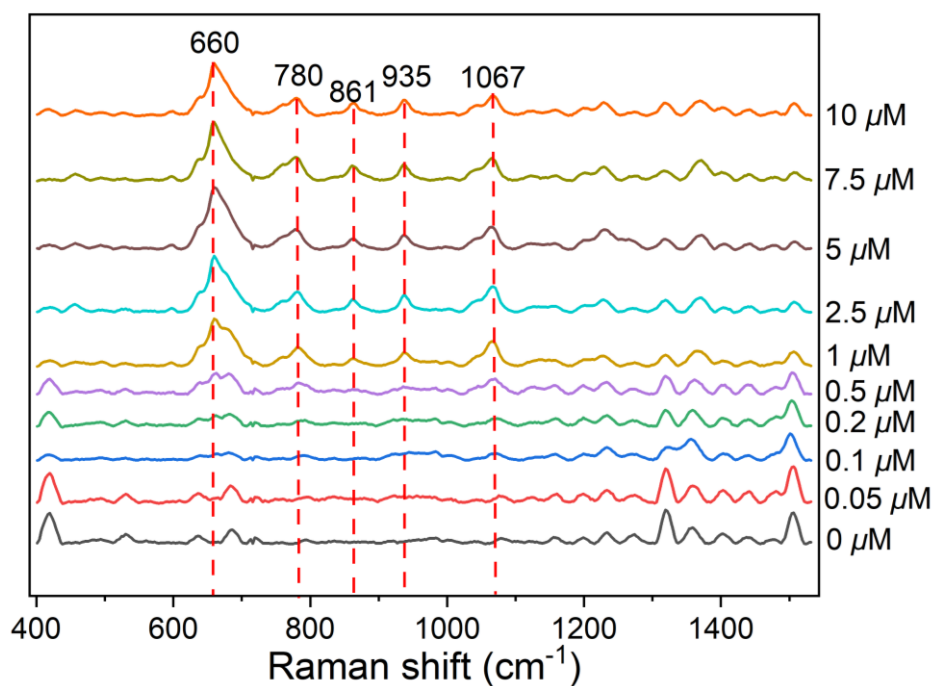

**Figure S2.** Hot-spot normalized SERS spectra of CLO collected from AuNP/BC substrates incubated in CLO solutions with concentrations ranging from 0 to 10  $\mu\text{M}$ . Raman bands at 660, 780, 861, 935 and 1067  $\text{cm}^{-1}$  are identified as the fingerprint features of CLO.

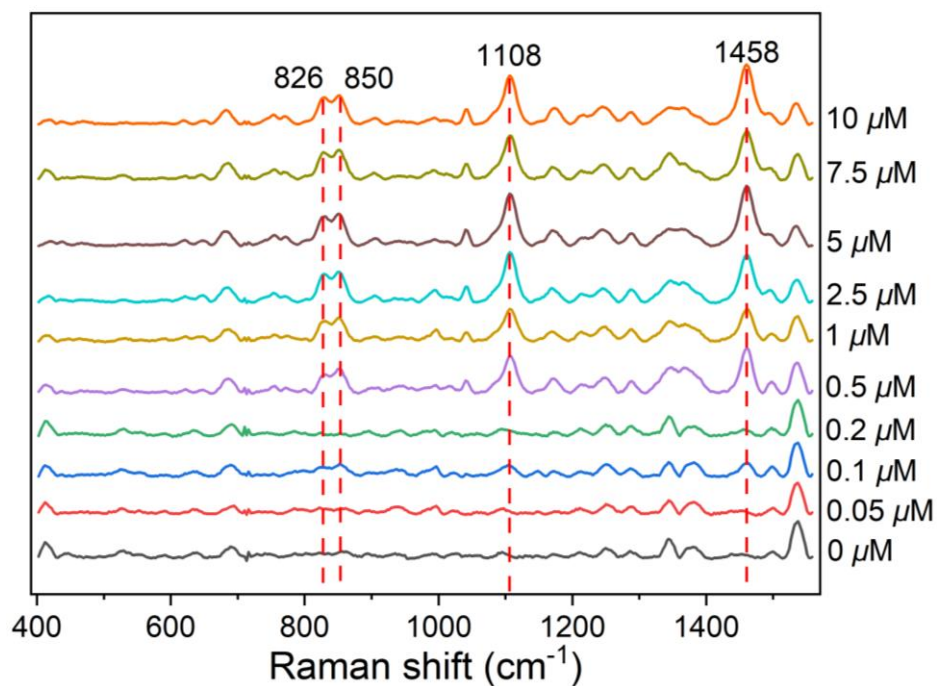

**Figure S3.** Hot-spot normalized SERS spectra of IMD collected from AuNP/BC substrates incubated in IMD solutions with concentrations ranging from 0 to 10  $\mu\text{M}$ . Raman bands at 826, 850, 1108, and 1458  $\text{cm}^{-1}$  are identified as the fingerprint features of IMD.

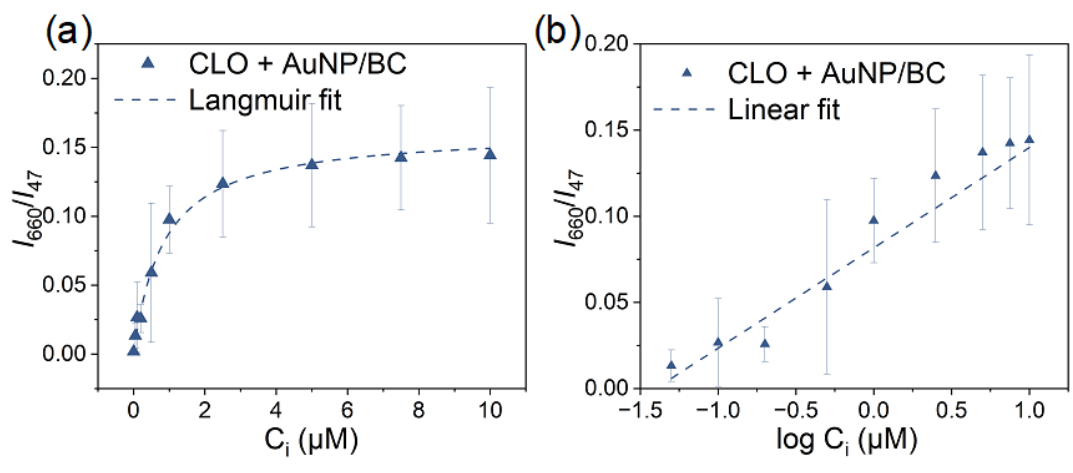

**Figure S4.** (a) Variation of the normalized CLO SERS intensities as a function of initial solution concentrations,  $C_i$ . (b) Variation of normalized CLO SERS intensities as a function of logarithmic initial solution concentrations,  $\log C_i$ .



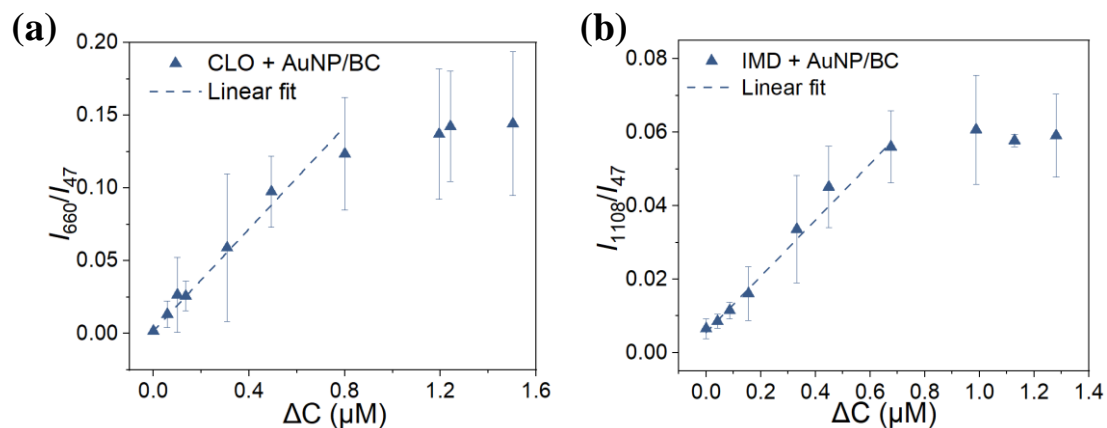

**Figure S5.** (a) Variation of the normalized SERS intensities of CLO as a function of its differential concentrations,  $\Delta C$ , with an extended initial concentration range from 0 to 10  $\mu\text{M}$ . Within the range of 0.05 to 2.5  $\mu\text{M}$ , a linear relationship was observed. Beyond 2.5  $\mu\text{M}$ , there was a notable deviation from the linear fitting curve. (b) Variation of the normalized SERS intensities of IMD as a function of its differential concentrations,  $\Delta C$ , with an extended initial concentration range from 0 to 10  $\mu\text{M}$ . Similar relationships with CLO were observed for IMD.

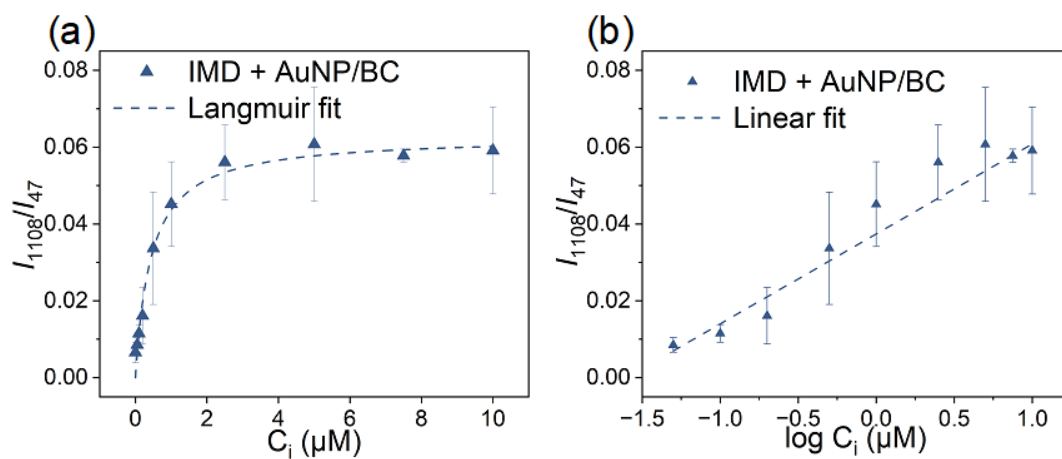

**Figure S6.** (a) Variation of normalized IMD SERS intensities as a function of initial solution concentration,  $C_i$ . (b) Variation of normalized IMD SERS intensities as a function of logarithmic initial IMD concentrations,  $\log C_i$ .
